# Supplementary material for: An Improvement of SPME-Based Sampling Technique to Collect Volatile Organic Compounds from Quercus ilex at the Environmental Level
Source: MDPI journal article supplement (doi:10.3390/metabo11060388), 2021-06-14
Supplement: s1 [file s1]

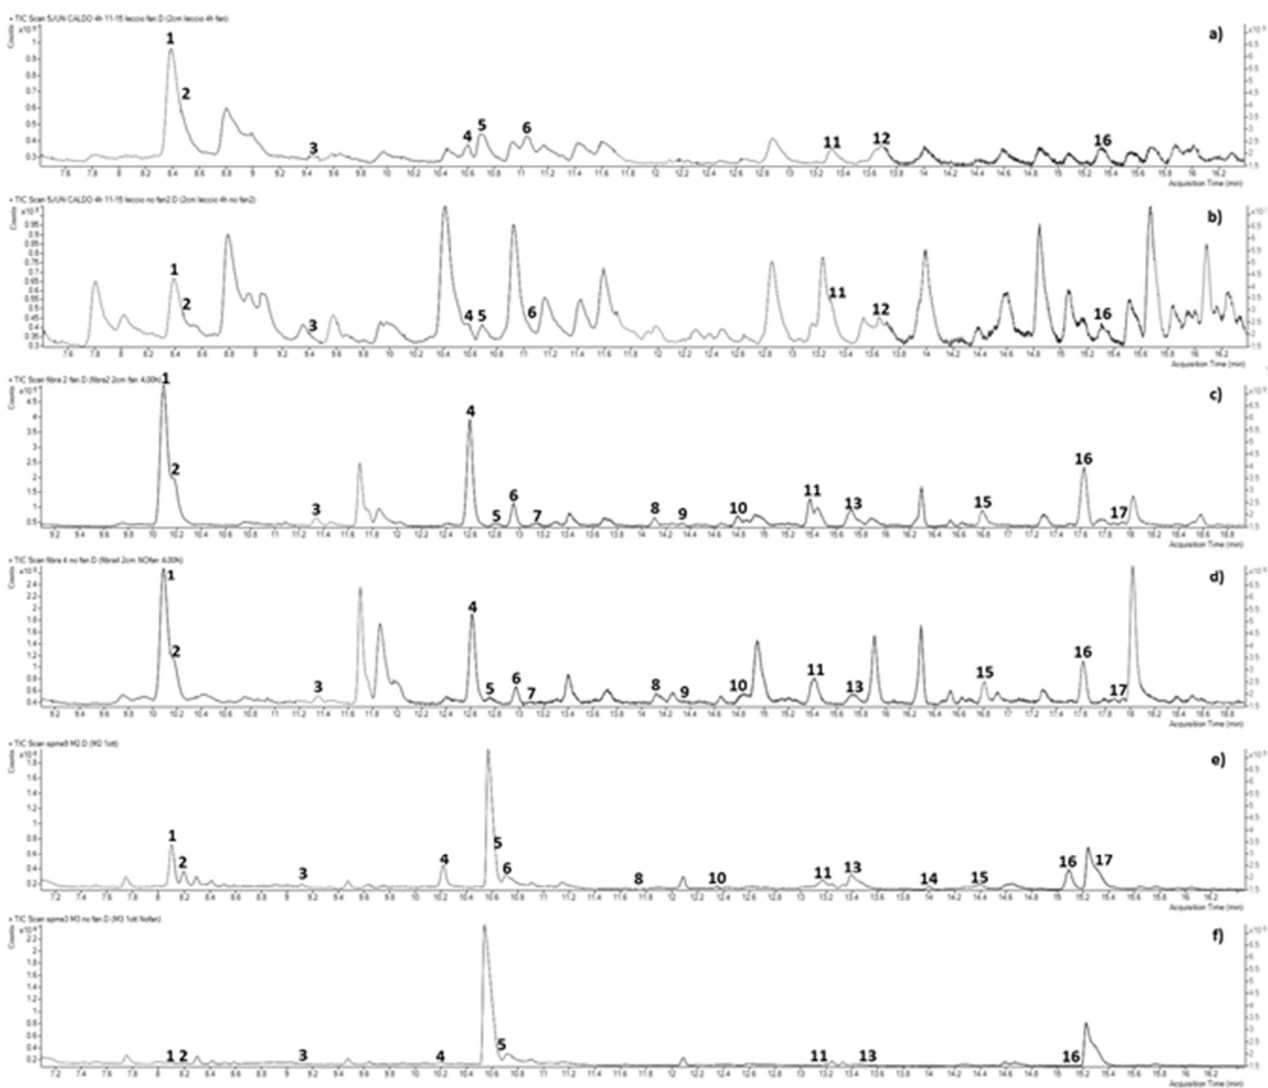

**Figure S1.** Representative Total Ion Chromatograms (TIC) for each sampling point using the two different methods (DBSS and static sampling): a) DBSS at sampling point 1; b) static method at sampling point 1; c) DBSS at sampling point 2; d) static method at sampling point 2; e) DBSS at sampling point 3; f) static method at sampling point 3. The numbered peaks correspond to: (1)  $\alpha$ -pinene, (2)  $\alpha$ -thujene, (3) camphene, (4)  $\beta$ -pinene, (5) sabinene, (6) car-3-ene, (7)  $\beta$ -phellandrene, (8) myrcene, (9)  $\alpha$ -phellandrene, (10)  $\alpha$ -terpinene, (11) d-limonene, (12) 1,8-cineole, (13)  $\beta$ -cis-ocimene, (14)  $\beta$ -trans-ocimene, (15)  $\gamma$ -terpinene, (16) *p*-cymene, (17) terpinolene. The shift in the retention time observed in the peaks in the chromatograms obtained in sampling point 3 (e-f) is due to a difference in the length of the column.

**Table S1.** Statistical results obtained from one-way Analysis of Variance (ANOVA) of the amounts of compounds found in sampling point 1, using DBSS and static sampling techniques. (ns  $p>0.05$ ; \*  $p<0.05$ ; \*\*  $p<0.01$ ; \*\*\* $p<0.001$ ).

| Compounds         | F value | $p$    |    |
|-------------------|---------|--------|----|
| $\alpha$ -pinene  | 24.14   | 0.0080 | ** |
| $\alpha$ -thujene | 10.65   | 0.0310 | *  |
| camphene          | 23.04   | 0.0086 | ** |
| $\beta$ -pinene   | 0.12    | 0.7430 | ns |
| sabinene          | 3.15    | 0.151  | ns |
| car-3-ene         | 67.59   | 0.0012 | ** |
| d-limonene        | 7.66    | 0.0505 | ns |
| 1,8-cineole       | 4.81    | 0.0934 | ns |
| $p$ -cymene       | 1.84    | 0.2460 | ns |

**Table S2.** Statistical results obtained from one-way Analysis of Variance (ANOVA) of the amounts of compounds found in sampling point 2, using DBSS and static sampling techniques. (ns  $p>0.05$ ; \*  $p<0.05$ ; \*\*  $p<0.01$ ; \*\*\* $p<0.001$ ).

| Compounds              | F value | <i>p</i> |     |
|------------------------|---------|----------|-----|
| $\alpha$ -pinene       | 5.27    | 0.0833   | ns  |
| $\alpha$ -thujene      | 38.78   | 0.0034   | **  |
| camphene               | 33.54   | 0.0044   | **  |
| $\beta$ -pinene        | 25.16   | 0.0074   | **  |
| sabinene               | 33.3    | 0.0045   | **  |
| car-3-ene              | 3.46    | 0.1370   | ns  |
| $\beta$ -phellandrene  | 3.97    | 0.1170   | ns  |
| myrcene                | 12.30   | 0.0247   | *   |
| $\alpha$ -phellandrene | 47.88   | 0.0023   | **  |
| $\alpha$ -terpinene    | 54.69   | 0.0018   | **  |
| d-limonene             | 69.81   | 0.0011   | **  |
| $\beta$ -cis-ocimene   | 119.40  | 0.0004   | *** |
| $\gamma$ -terpinene    | 46.55   | 0.0024   | **  |
| <i>p</i> -cymene       | 9.81    | 0.0351   | *   |
| terpinolene            | 11.20   | 0.0286   | *   |

**Table S3.** Statistical results obtained from one-way Analysis of Variance (ANOVA) of the amounts of compounds found in sampling point 3, using DBSS and static sampling techniques. (ns  $p>0.05$ ; \*  $p<0.05$ ; \*\*  $p<0.01$ ; \*\*\* $p<0.001$ )

| Compounds              | F value | <i>p</i> |     |
|------------------------|---------|----------|-----|
| $\alpha$ -pinene       | 30.56   | 0.0052   | **  |
| $\alpha$ -thujene      | 48.34   | 0.0022   | **  |
| camphene               | 86.29   | 0.0007   | *** |
| $\beta$ -pinene        | 28.77   | 0.0058   | **  |
| sabinene               | 27.92   | 0.0061   | **  |
| car-3-ene              | 17.74   | 0.0136   | *   |
| myrcene                | 33.69   | 0.0044   | **  |
| $\alpha$ -terpinene    | 17.50   | 0.0139   | *   |
| d-limonene             | 101     | 0.0005   | *** |
| $\beta$ -cis-ocimene   | 19.39   | 0.0117   | *   |
| $\beta$ -trans-ocimene | 43.63   | 0.0027   | **  |
| $\gamma$ -terpinene    | 36.16   | 0.0038   | **  |
| <i>p</i> -cymene       | 55.03   | 0.0018   | **  |
| terpinolene            | 34.28   | 0.0042   | **  |

**Table S4.** Statistical results obtained from one-way Analysis of Variance (ANOVA) of the total amounts of compounds found in each sampling points (1, 2, 3), using DBSS and static sampling techniques. (ns  $p>0.05$ ; \*  $p<0.05$ ; \*\*  $p<0.01$ ; \*\*\* $p<0.001$ )

| Sampling point | F value | $p$    |     |
|----------------|---------|--------|-----|
| 1              | 43.77   | 0.0027 | **  |
| 2              | 114.1   | 0.0004 | *** |
| 3              | 73.63   | 0.0010 | **  |
